# Supplementary material
Source: MDPI journal article supplement (https://www.mdpi.com/2504-477X/7/12/492)
Supplement: s1 [file s1]

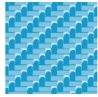

## Supplementary Materials

**Table S1.** Variance analysis for dielectric constant.

| Source              | DF | Seq SS   | Adj SS   | Adj MS   | F     | P-Value |
|---------------------|----|----------|----------|----------|-------|---------|
| W <sub>CA</sub> (%) | 2  | 0.019957 | 0.019957 | 0.009978 | 30.53 | 0.032   |
| Infill (%)          | 2  | 0.197962 | 0.197962 | 0.098981 | 302.8 | 0.003   |
| Thickness (mm)      | 2  | 0.009617 | 0.009617 | 0.004809 | 14.71 | 0.064   |
| Residual Error      | 2  | 0.000654 | 0.000654 | 0.000327 |       |         |
| Total               | 8  | 0.228189 |          |          |       |         |

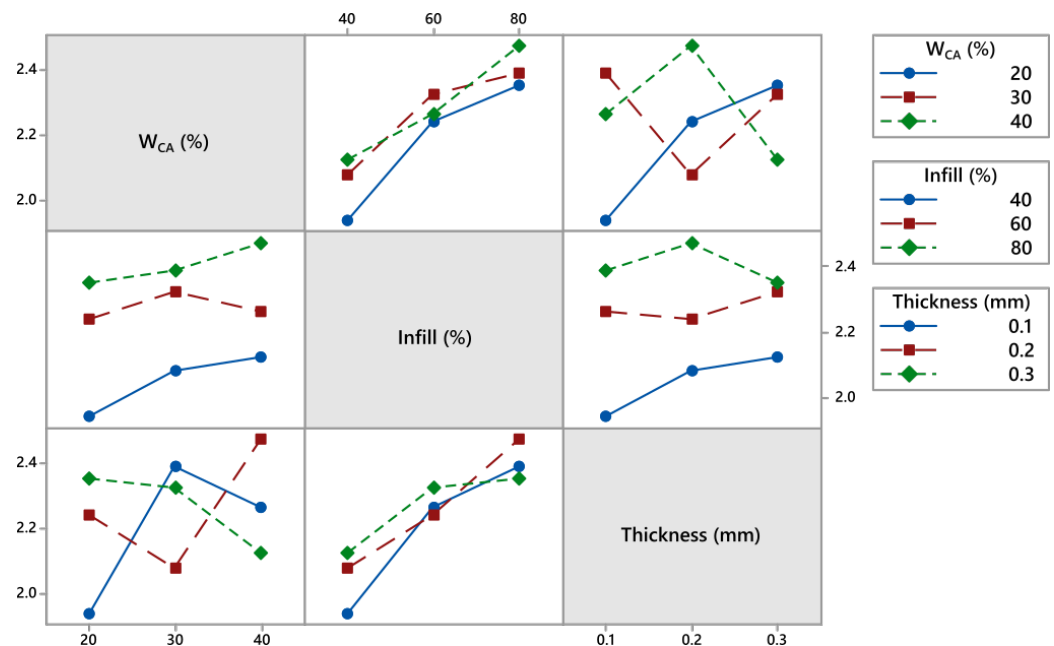

**Figure S1.** Interaction plots for dielectric constant.

**Table S2.** Response table for dielectric constant.

| Level | W <sub>CA</sub> (%) | Infill (%) | Thickness (mm) |
|-------|---------------------|------------|----------------|
| 1     | 2.179               | 2.048      | 2.198          |
| 2     | 2.265               | 2.278      | 2.266          |
| 3     | 2.288               | 2.407      | 2.269          |
| Delta | 0.109               | 0.359      | 0.071          |
| Rank  | 2                   | 1          | 3              |

**Table S3.** Variance analysis of log (electrical conductivity).

| Source              | DF | Seq SS   | Adj SS   | Adj MS   | F     | P-Value |
|---------------------|----|----------|----------|----------|-------|---------|
| W <sub>CA</sub> (%) | 2  | 0.034228 | 0.034228 | 0.017114 | 29.91 | 0.032   |
| Infill (%)          | 2  | 0.088931 | 0.088931 | 0.044466 | 77.72 | 0.013   |
| Thickness (mm)      | 2  | 0.005803 | 0.005803 | 0.002902 | 5.07  | 0.165   |
| Residual Error      | 2  | 0.001144 | 0.001144 | 0.000572 |       |         |
| Total               | 8  | 0.130107 |          |          |       |         |

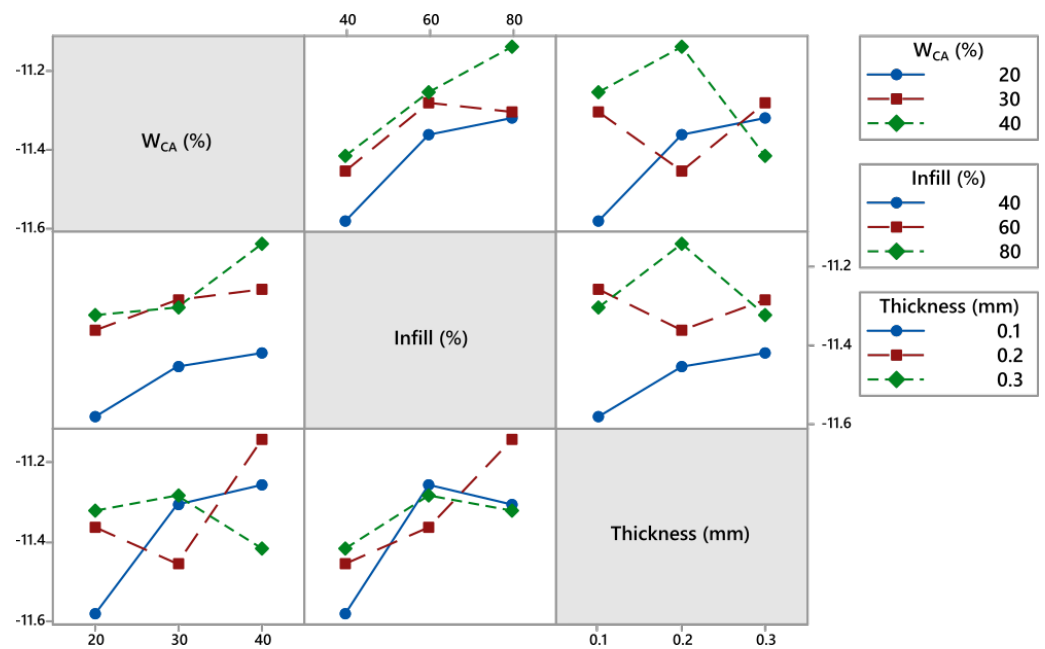

Figure S2. Interaction plots for log (electrical conductivity).

Table S4. Response table for log (electrical conductivity).

| Level | W <sub>CA</sub> (%) | Infill (%) | Thickness (mm) |
|-------|---------------------|------------|----------------|
| 1     | -11.1668            | -11.2296   | -11.1251       |
| 2     | -11.0918            | -11.0451   | -11.0638       |
| 3     | -11.0158            | -10.9997   | -11.0854       |
| Delta | 0.1511              | 0.2299     | 0.0613         |
| Rank  | 2                   | 1          | 3              |

Table S5. : Notable temperature for PLA:CA blends. measured by DSC at 10K·min<sup>-1</sup>.

|       | T <sub>g</sub> PLA (cool) | T <sub>g</sub> PLA (heat) | T <sub>cc</sub> PLA | T <sub>f</sub> PLA | X <sub>cr</sub> (%) |
|-------|---------------------------|---------------------------|---------------------|--------------------|---------------------|
| PLA   | 52.6 ± 0.9                | 61.7 ± 0.4                | 127.6 ± 0.1         | 154.2 ± 0.6        | 0.7                 |
| CA-10 | 46.4 ± 0.2                | 56.4 ± 0.7                | 122.9 ± 1.1         | 152.4 ± 0.5        | > 0.5               |
| CA-20 | 41.4 ± 0.1                | 51.6 ± 0.4                | 120.6 ± 0.6         | 150.2 ± 0.2        | > 0.5               |
| CA-30 | 35.1 ± 0.9                | 47.1 ± 1.2                | 117.3 ± 1.2         | 148.9 ± 1.0        | > 0.5               |
| CA-40 | 31.3 ± 1.5                | 41.1 ± 1.5                | 110.8 ± 1.4         | 145.9 ± 0.4        | > 0.5               |

Table S6. Variance analysis of storage modulus at 30°C (@ 1 Hz).

| Source              | DF | Seq SS | Adj SS | Adj MS | F    | P     |
|---------------------|----|--------|--------|--------|------|-------|
| W <sub>CA</sub> (%) | 2  | 104368 | 104368 | 52184  | 8.69 | 0.103 |
| Infill (%)          | 2  | 52391  | 52391  | 26195  | 4.36 | 0.186 |
| Thickness (mm)      | 2  | 28730  | 28730  | 14365  | 2.39 | 0.295 |
| Residual Error      | 2  | 12010  | 12010  | 6005   |      |       |
| Total               | 8  | 197499 |        |        |      |       |

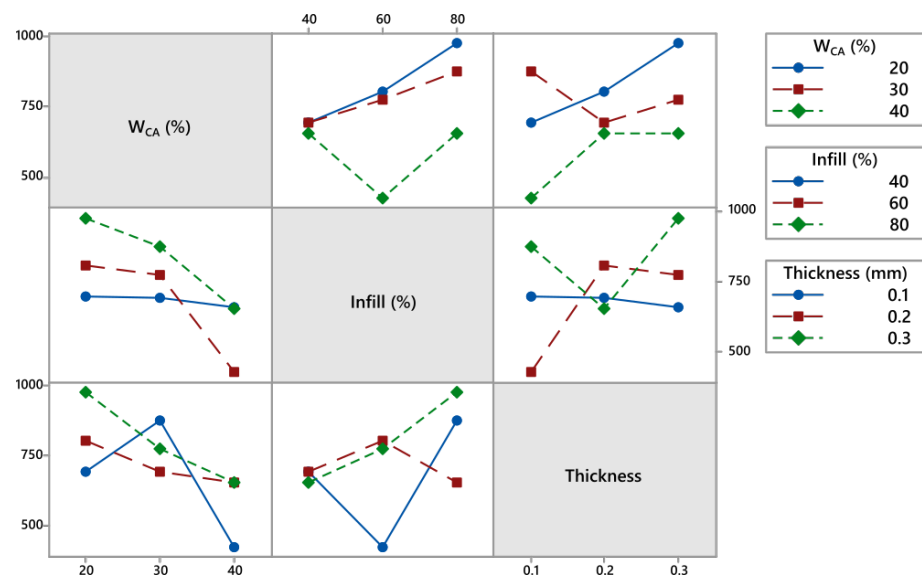

Figure S3. Interaction plots for storage modulus.

Table S7. Response table for storage modulus.

| Level | W <sub>CA</sub> (%) | Infill (%) | Thickness (mm) |
|-------|---------------------|------------|----------------|
| 1     | 825.6               | 680.9      | 665.5          |
| 2     | 781.4               | 668.3      | 717.4          |
| 3     | 578.3               | 836.1      | 802.5          |
| Delta | 247.3               | 167.8      | 137.1          |
| Rank  | 1                   | 2          | 3              |

Table S8. Variance analysis of PLA's glass transition temperature (@ 1 Hz).

| Source              | DF | Seq SS  | Adj SS  | Adj MS  | F      | P     |
|---------------------|----|---------|---------|---------|--------|-------|
| W <sub>CA</sub> (%) | 2  | 179.336 | 179.336 | 89.6678 | 180.14 | 0.006 |
| Infill (%)          | 2  | 0.642   | 0.642   | 0.3211  | 0.65   | 0.608 |
| Thickness (mm)      | 2  | 0.576   | 0.576   | 0.2878  | 0.58   | 0.634 |
| Residual Error      | 2  | 0.996   | 0.996   | 0.4978  |        |       |
| Total               | 8  | 181.549 |         |         |        |       |

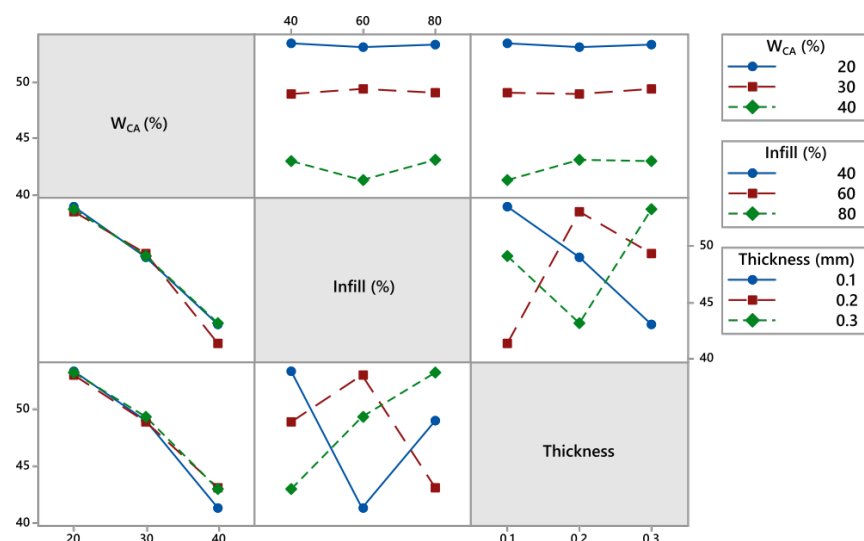

Figure S4. Interaction plots for glass transition temperature of PLA.
